# Supplementary material for: Prediction of the absolute hydraulic conductivity function from soil water retention data
Source: Copernicus journal article supplement (doi:10.5194/hess-27-1565-2023), 2023-04-17
Supplement: Supplementary file 1 [file hess-27-1565-2023-supplement.pdf]

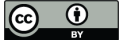

*Supplement of*

## **Prediction of the absolute hydraulic conductivity function from soil water retention data**

**Andre Peters et al.**

*Correspondence to:* Andre Peters (a.peters@tu-braunschweig.de)

The copyright of individual parts of the supplement might differ from the article licence.

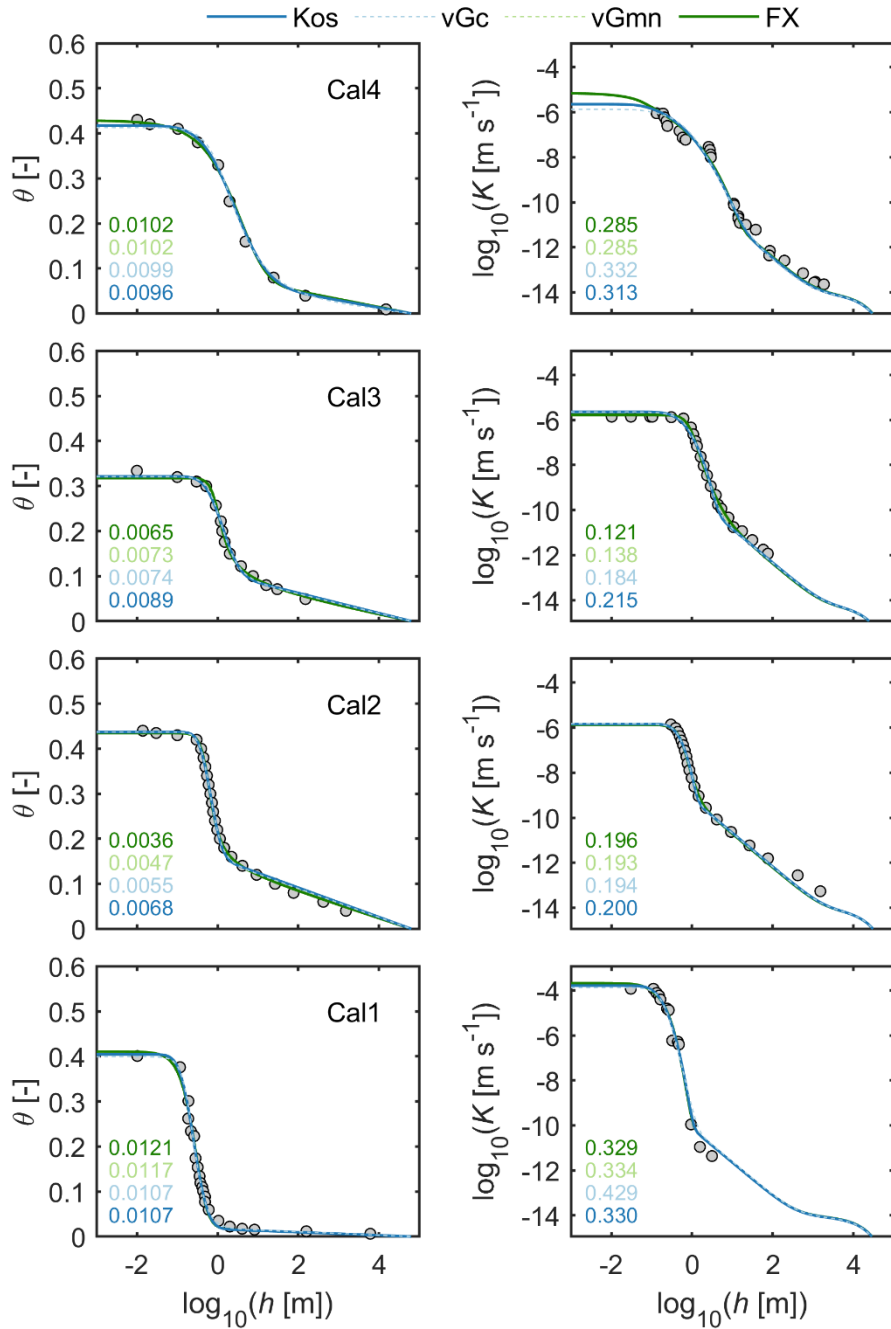

14

15 S1: Calibration data sets and the fitted water retention and conductivity functions used to calibrate  
 16 the saturated tortuosity coefficient  $\tau_s$  in Eq. (19). Shown are data set 1 to 4 of the 12 calibration data  
 17 sets. Parameter  $\lambda$  was set to a value of 0.5 according to Mualem (1976a). Parameter  $\tau_s$  and the  
 18 retention parameters were allowed to vary. Numbers in the subplots indicate RMSE<sub>θ</sub> and RMSE<sub>logK</sub>  
 19 values for the various model combinations.

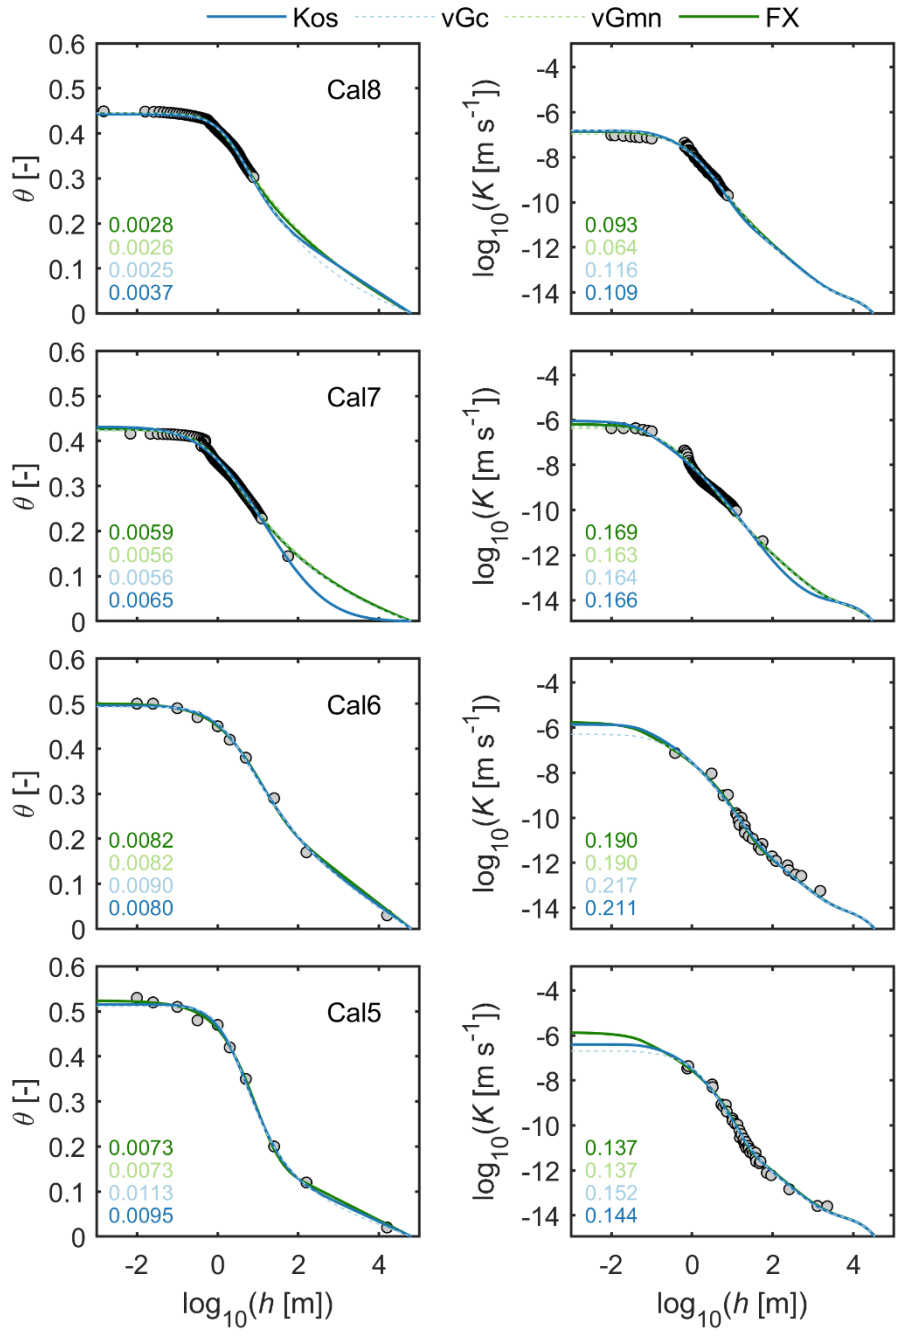

20

21 S2: Calibration data sets and the fitted water retention and conductivity functions used to calibrate  
 22 the saturated tortuosity coefficient  $\tau_s$  in Eq. (19). Shown are data set 5 to 8 of the 12 calibration data  
 23 sets. Parameter  $\lambda$  was set to a value of 0.5 according to Mualem (1976a). Parameter  $\tau_s$  and the  
 24 retention parameters were allowed to vary. Numbers in the subplots indicate RMSE<sub>θ</sub> and RMSE<sub>logK</sub>  
 25 values for the various model combinations.

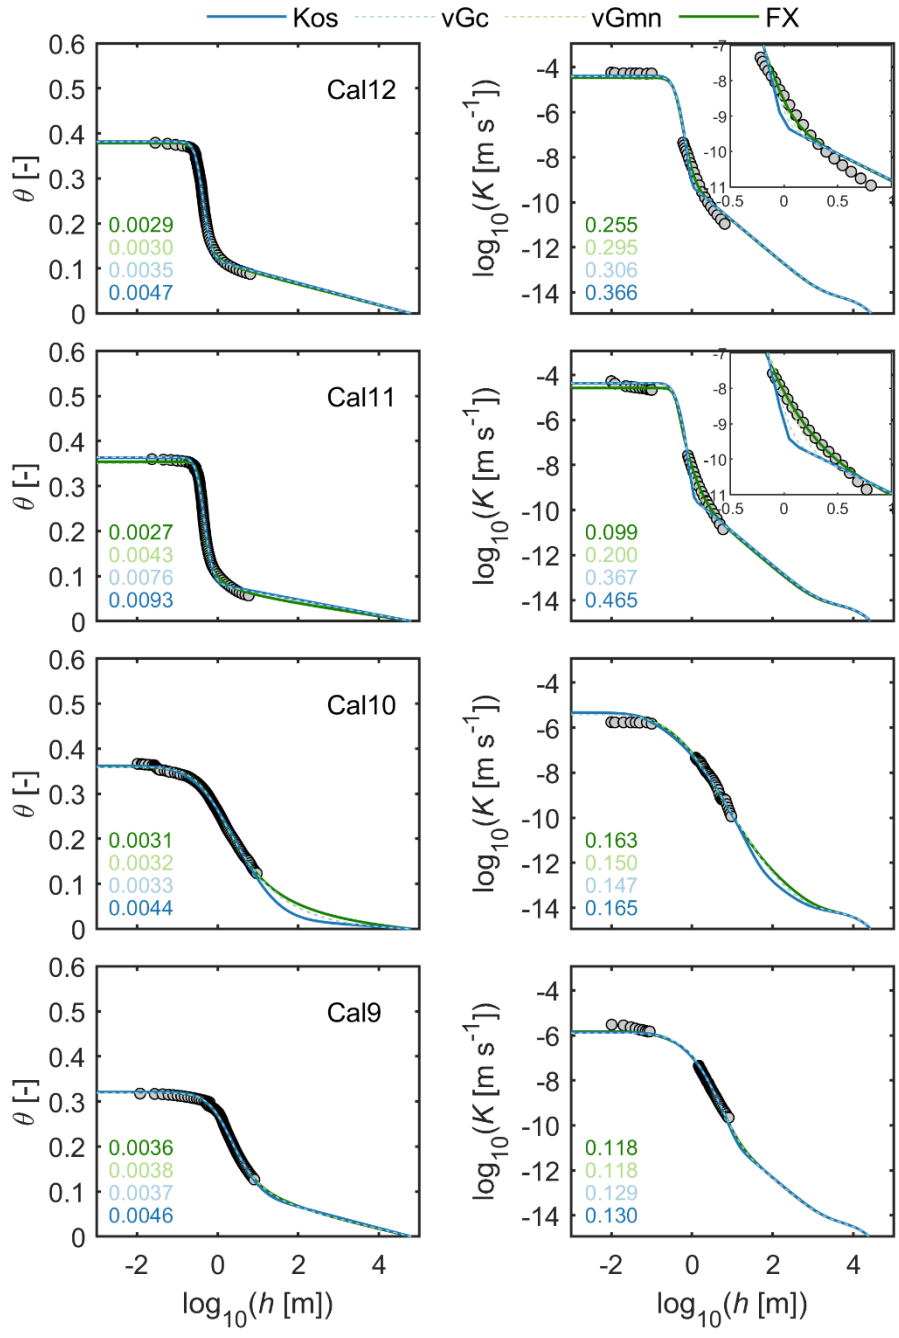

26

27 S3: Calibration data sets and the fitted water retention and conductivity functions used to calibrate  
 28 the saturated tortuosity coefficient  $\tau_s$  in Eq. (19). Shown are data set 9 to 12 of the 12 calibration  
 29 data sets. Parameter  $\lambda$  was set to a value of 0.5 according to Mualem (1976a). Parameter  $\tau_s$  and the  
 30 retention parameters were allowed to vary. Numbers in the subplots indicate RMSE<sub>θ</sub> and RMSE<sub>logK</sub>  
 31 values for the various model combinations.

32

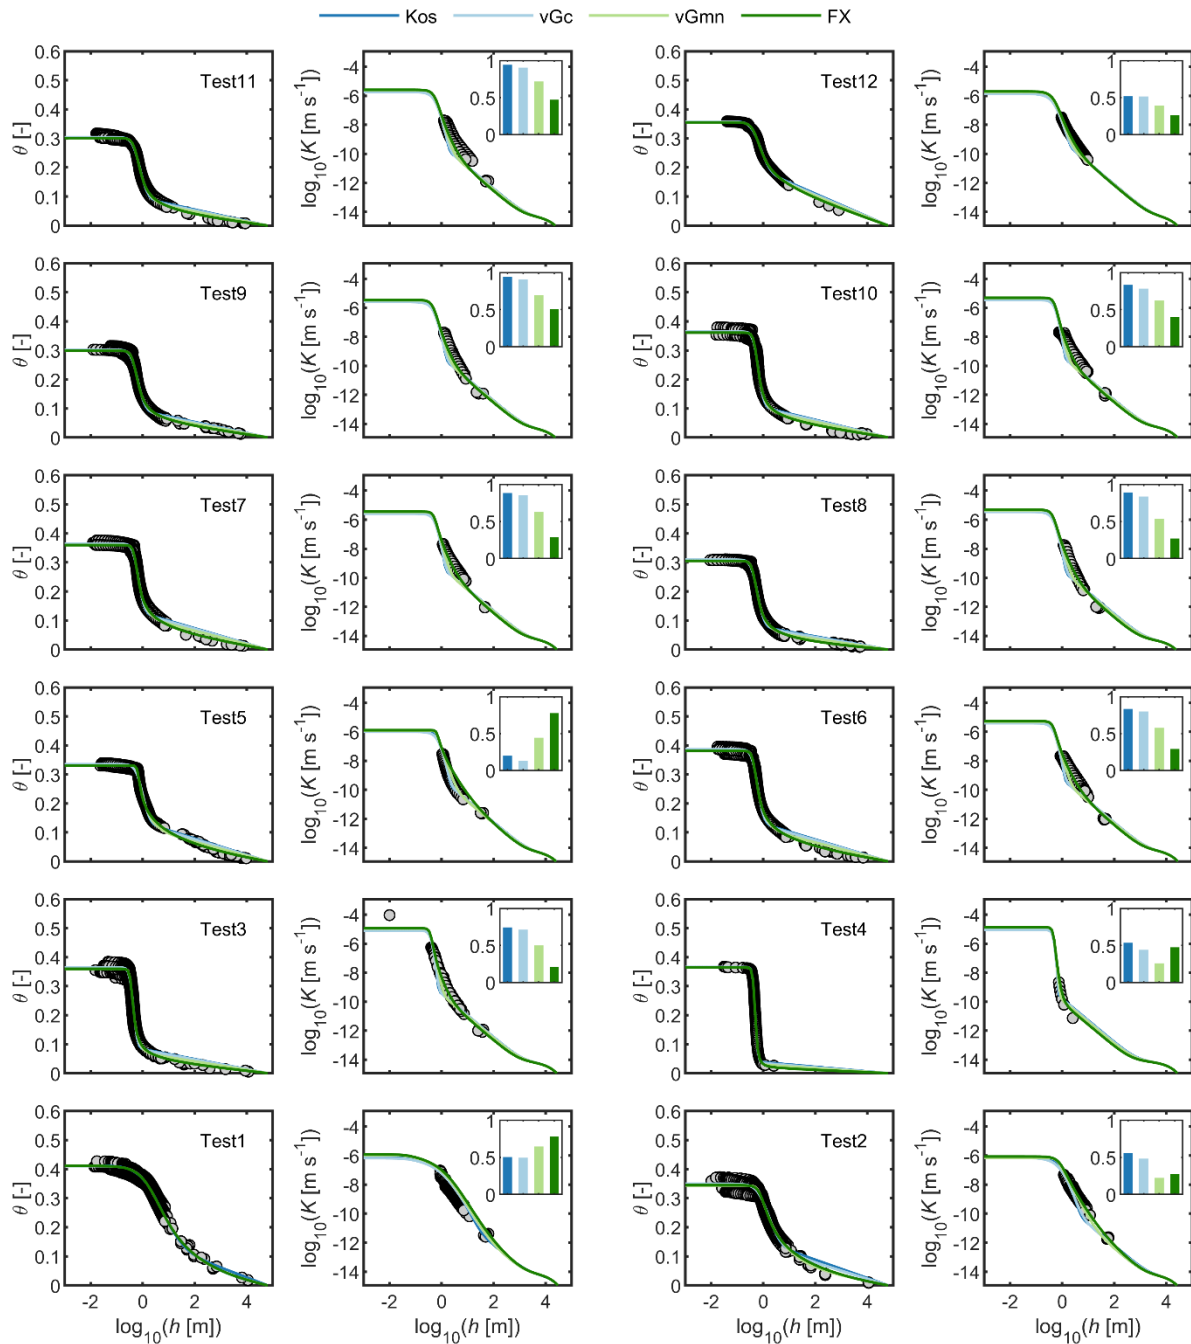

33

34 S4: Measured data (dots), fitted retention functions (left) and predicted conductivity functions  
 35 (right). Shown are the first 12 out of the 23 test data sets. Bars show the RMSE<sub>logK</sub> values for the  
 36 different used basic functions. Note that the conductivity curves are not fits to the data but pure  
 37 predictions.

38

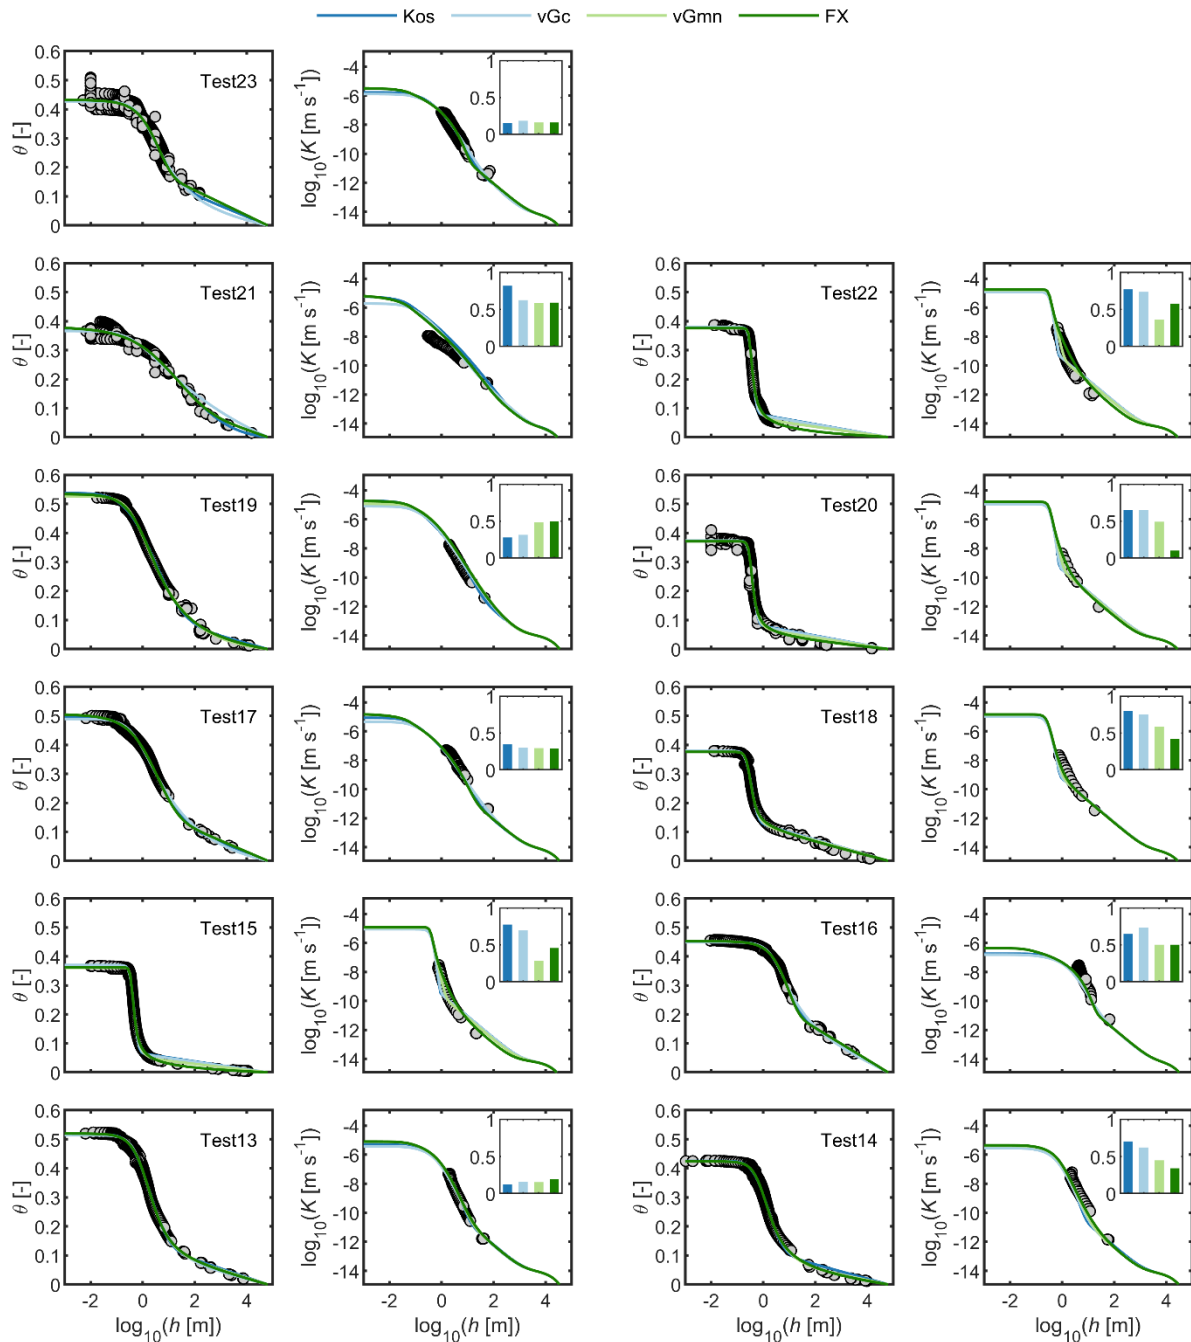

39

40 S5: Measured data (dots), fitted retention functions (left) and predicted conductivity functions  
 41 (right). Shown are data set 13 to 23 of the test data sets. Bars show the  $RMSE_{\log K}$  values for the  
 42 different used basic functions. Note that the conductivity curves are not fits to the data but pure  
 43 predictions.

44

45
